# Supplementary material for: On-line clean-up and LC-MS analysis of primary metabolites in cell culture supernatants
Source: Royal Society of Chemistry journal article supplement (doi:10.1039/c7ay02034a), 2017-01-01
Supplement: c7ay02034a1.pdf [file c7ay02034a1.pdf]

**Table S1:** Information on target analytes and respective abbreviations, including retention time on employed column and accurate mass of monoisotopic and its fully <sup>13</sup>C labeled analogue.

| Abbreviation | Compound Name                               | polarity | monoisotopic m/z | U <sup>13</sup> C analogue m/z | Column | Retention time [min] |
|--------------|---------------------------------------------|----------|------------------|--------------------------------|--------|----------------------|
| Val          | Valine                                      | +        | 118.0863         | 123.1030                       | HILIC  | 1.7                  |
| Tyr          | Tyrosine                                    | +        | 182.0812         | 191.1114                       | HILIC  | 1.7                  |
| Ser          | Serine                                      | +        | 106.0499         | 109.0599                       | HILIC  | 1.8                  |
| Pro          | Proline                                     | +        | 116.0706         | 121.0874                       | HILIC  | 2.0                  |
| Thr          | Threonine                                   | +        | 120.0655         | 124.0789                       | HILIC  | 2.1                  |
| Gln          | Glutamine                                   | +        | 147.0764         | 152.0932                       | HILIC  | 2.2                  |
| Glu          | Glutamate                                   | +        | 148.0604         | 153.0772                       | HILIC  | 2.4                  |
| Arg          | Arginine                                    | +        | 175.1190         | 181.1391                       | HILIC  | 4.1                  |
| Lys          | Lysine                                      | +        | 147.1128         | 153.1329                       | HILIC  | 4.3                  |
| His          | Histidine                                   | +        | 156.0768         | 162.0969                       | HILIC  | 4.4                  |
| Asn          | Asparagine                                  | -        | 131.0462         | 135.0596                       | RPLC   | 2.2                  |
| Asp          | Aspartate                                   | -        | 132.0302         | 136.0437                       | RPLC   | 2.2                  |
| Ala          | Alanine                                     | -        | 88.0404          | 91.0505                        | RPLC   | 2.3                  |
| PEP          | Phosphoenolpyruvate                         | -        | 166.9751         | 169.9852                       | RPLC   | 3.3                  |
| Pyr          | Pyruvate                                    | -        | 87.0088          | 90.0188                        | RPLC   | 3.5                  |
| Mal          | Malate                                      | -        | 133.0142         | 137.0277                       | RPLC   | 3.6                  |
| Val          | Valine                                      | -        | 116.0717         | 121.0885                       | RPLC   | 3.6                  |
| 5'CMP        | Cytidine 5'-monophosphate                   | -        | 322.0446         | 331.0748                       | RPLC   | 3.8                  |
| I-Cit        | I-Citrate                                   | -        | 191.0197         | 197.0399                       | RPLC   | 3.8                  |
| Lac          | Lactate                                     | -        | 89.0244          | 92.0345                        | RPLC   | 4.5                  |
| Met          | Methionine                                  | -        | 148.0438         | 153.0605                       | RPLC   | 4.6                  |
| AKG          | α-Ketoglutarate                             | -        | 145.0142         | 150.031                        | RPLC   | 5.1                  |
| 5'UMP        | Uridine 5'-monophosphate                    | -        | 323.0286         | 332.0588                       | RPLC   | 5.8                  |
| 5'AMP        | Adenosine 5'-monophosphate                  | -        | 346.0558         | 356.0894                       | RPLC   | 6.1                  |
| Cit          | Citrate                                     | -        | 191.0197         | 197.0399                       | RPLC   | 6.2                  |
| NADP         | Nicotinamide adenine dinucleotide phosphate | -        | 742.0682         | 763.1386                       | RPLC   | 6.5                  |
| Ile          | Isoleucine                                  | -        | 130.0874         | 136.1075                       | RPLC   | 6.5                  |
| 5'GMP        | Guanosine 5'-monophosphate                  | -        | 362.0507         | 372.0843                       | RPLC   | 6.6                  |
| NAD          | Nicotinamide adenine dinucleotide           | -        | 662.1018         | 683.1712                       | RPLC   | 6.7                  |
| Leu          | Leucine                                     | -        | 130.0874         | 136.1075                       | RPLC   | 6.7                  |
| Fum          | Fumarate                                    | -        | 115.0037         | 119.0171                       | RPLC   | 6.8                  |
| Suc          | Succinate                                   | -        | 117.0193         | 121.0328                       | RPLC   | 6.9                  |
| 3'AMP        | Adenosine 3'-monophosphate                  | -        | 346.0558         | 356.0894                       | RPLC   | 7.2                  |
| Aco          | Aconitate                                   | -        | 173.0092         | 179.0293                       | RPLC   | 7.5                  |
| Phe          | Phenylalanine                               | -        | 164.0717         | 173.1019                       | RPLC   | 8.9                  |
| Trp          | Tryptophane                                 | -        | 203.0826         | 214.1195                       | RPLC   | 10.5                 |
| Ri-Fl        | Riboflavine                                 | -        | 375.1310         | 392.1880                       | RPLC   | 13.6                 |

**Table S2:** Results on recovery of the off-line dispersive SPE method using a mixture of C18 and strong cationic exchange bulk material for clean-up measured on an LC-MS/MS System (consisting of a Thermo Scientific CTC PAL autosampler, Thermo Scientific Accela 1259 pump, and Thermo Scientific TSQ Vantage ESI-MS/MS). Samples were prepared in 5 replicates and recovery was determined comparing the ratio of the monoisotopic m/z signal (= internal standards) and uniformly labeled analogue. For compounds marked with an asterisk "\*", the signal of the internal standard was too low or saturated and therefore determination of recovery was based on comparison of U<sup>13</sup>C intensities instead.

| <b>Metabolite</b>        | <b>Average [%]</b> | <b>SD [%]</b> |
|--------------------------|--------------------|---------------|
| 3AMP (RPLC)              | 84.7               | 6.6           |
| 5AMP (RPLC)              | 92.5               | 3.7           |
| 5CMP (RPLC)*             | 84.7               | 6.6           |
| 5GMP (RPLC)              | 89.2               | 26.3          |
| AKG (RPLC)*              | 87.3               | 34.8          |
| Ala (HILIC)*             | 89.2               | 26.3          |
| Arg (HILIC)              | 92.8               | 2.5           |
| Asn (HILIC)              | 75.7               | 19.9          |
| Asp (HILIC)              | 94.9               | 10.7          |
| Cit (RPLC)               | 87.0               | 1.5           |
| Fum (RPLC)*              | 97.3               | 15.8          |
| Gln (HILIC)              | 94.9               | 5.9           |
| Glu (HILIC)              | 91.9               | 9.3           |
| His (HILIC)              | 91.4               | 2.8           |
| Ile (RPLC)               | 97.9               | 7.5           |
| Leu(RPLC)                | 94.6               | 12.8          |
| Lys (HILIC)              | 90.2               | 2.1           |
| Mal (RPLC)               | 92.2               | 17.3          |
| Met (RPLC)               | 93.2               | 14.5          |
| NAD <sup>+</sup> (RPLC)* | 68.5               | 4.8           |
| NADP (RPLC)*             | 52.5               | 5.5           |
| Phe (RPLC)*              | 92.5               | 3.7           |
| Pro (HILIC)*             | 116.5              | 13.7          |
| Ser (HILIC)              | 93.0               | 13.1          |
| Suc (RPLC)*              | 91.3               | 18.2          |
| Thr (HILIC)              | 97.7               | 8.6           |
| Trp (RPLC)               | 89.7               | 3.0           |
| Tyr (HILIC)              | 88.2               | 8.0           |
| Val (HILIC)              | 91.8               | 9.3           |
| Val (RPLC)               | 97.0               | 5.7           |

**Table S3:** Recoveries of metabolites in CHO cell culture supernatants during pre-experiments for clean-up procedure given in percent. All values were estimated with single experiments and therefore have an estimated RSD of 20%. F: Filtration, SA: Solid phase extraction with strong cationic exchanger, C4: Solid phase extraction with C<sub>4</sub> material, C18: Solid phase extraction with C<sub>18</sub> material. Separation with “-“ marks sequential application of preparation steps. Due to low signal intensity of the <sup>13</sup>C analogue, recovery values that are underlined are assessed by direct comparison of intensities of the monoisotopic mass. For chromatographic peaks showing a signal to noise ratio (S/N) of < 10, no values were reported.

| Meta-<br>bolites | F-SA-C18     |             |            | F-C4        |             | F-C4<br>(H <sub>2</sub> O) |              | F-C4<br>(pH 4.5) |              | F-C4<br>(pH 8) |
|------------------|--------------|-------------|------------|-------------|-------------|----------------------------|--------------|------------------|--------------|----------------|
|                  | F            | SA          | C18        | F           | C4          | F                          | C4           | F                | C4           |                |
| PEP              | 88.9         | 77.8        | 22.2       | 87.6        | 70.3        | 100.0                      | 135.0        | 104.9            | 109.9        | 88.0           |
| Pyr              | 100.0        | 69.8        | 11.1       | 100.0       | 80.0        | 100.0                      | 71.4         | 101.6            | 100.0        | 99.0           |
| Cit              | 100.0        | 71.4        | 1.7        | 92.9        | 68.1        | 100.0                      | 97.5         | 102.0            | 103.4        | 81.6           |
| Iso-Cit          | 100.0        | 50.0        | 8.3        | 68.8        | 68.9        | 100.0                      | 95.2         | 96.2             | 103.9        | 110.0          |
| Aco              | 100.0        | 73.6        | 0.5        | 90.0        | 76.5        | 100.0                      | 108.9        | 94.7             | 93.3         | 84.0           |
| Akg              | 111.1        | 56.0        | 7.5        | 88.9        | 61.1        | 100.0                      | 87.5         | 117.3            | 115.4        | 88.9           |
| Suc              | 100.0        | 62.5        | 4.9        | 90.9        | 66.3        | 100.0                      | 117.9        | 107.0            | 108.9        | 83.5           |
| Fum              | 91.7         | 64.7        | 4.1        | 85.8        | 69.2        | 96.7                       | 99.7         | 115.4            | 106.9        | 91.6           |
| Mal              | 105.6        | 73.3        | 14.6       | 97.5        | 68.1        | 100.0                      | 100.6        | 103.5            | 99.7         | 92.7           |
| Met              | <u>100.0</u> | <u>2.0</u>  | <u>4.0</u> | 82.2        | 48.9        | 97.2                       | 90.0         | 105.2            | 87.3         | 88.9           |
| Val              | <u>100.0</u> | <u>0.0</u>  | <u>0.0</u> | 68.2        | 49.4        | 117.5                      | 107.7        | 89.7             | 97.1         | 89.0           |
| Ile              | 133.3        | 0.0         | 0.0        | 114.1       | 72.6        | 83.3                       | 109.7        | < S/N 10         |              | 80.0           |
| Leu              | 100.0        | 0.0         | 0.0        | 123.5       | 93.1        | 83.3                       | 105.0        | <u>126.0</u>     | <u>145.6</u> | 111.1          |
| Phe              | 100.0        | 0.0         | 0.0        | 90.2        | 38.6        | 100.0                      | 71.3         | 114.3            | 86.4         | 79.9           |
| Tyr              | 111.8        | 0.0         | 0.0        | 92.7        | 54.6        | 100.0                      | 83.1         | 87.7             | 73.4         | 84.2           |
| Trp              | 100.0        | 0.0         | 0.0        | 92.9        | 7.8         | 100.0                      | 49.1         | 113.3            | 46.3         | 37.0           |
| Ri-Fl            | <u>100.0</u> | <u>0.0</u>  | <u>0.0</u> | <u>92.9</u> | <u>0.0</u>  | <u>107.1</u>               | <u>0.0</u>   | < S/N 10         |              | <u>0.0</u>     |
| NAD              | 100.0        | 0.0         | 0.0        | 78.3        | 28.2        | 104.6                      | 74.2         | 60.9             | 49.2         | 66.2           |
| NADP             | 177.8        | 28.0        | 0.4        | 100.0       | 57.7        | 100.0                      | 85.9         | 98.5             | 28.7         | 75.0           |
| 3AMP             | <u>107.7</u> | <u>0.0</u>  | <u>0.0</u> | <u>97.0</u> | <u>6.7</u>  | <u>100.2</u>               | <u>82.7</u>  | < S/N 10         |              | <u>42.0</u>    |
| 5AMP             | <u>100.0</u> | <u>0.0</u>  | <u>0.0</u> | 88.6        | 31.6        | < S/N 10                   |              | < S/N 10         |              | 69.1           |
| 5CMP             | <u>100.0</u> | <u>26.7</u> | <u>7.1</u> | <u>96.5</u> | <u>74.3</u> | <u>99.9</u>                | <u>114.5</u> | <u>99.5</u>      | <u>123.7</u> | <u>96.0</u>    |
| 5GMP             | <u>100.0</u> | <u>10.0</u> | <u>0.0</u> | <u>97.4</u> | <u>68.3</u> | < S/N 10                   |              | <u>79.0</u>      | <u>94.1</u>  | 102.7          |
| 5UMP             | <u>100.0</u> | <u>67.5</u> | <u>6.0</u> | <u>94.5</u> | <u>66.8</u> | <u>102.9</u>               | <u>114.0</u> | <u>108.7%</u>    | <u>79.6</u>  | 82.7           |

**Table S4:** Assessment of recovery in % of target analytes in a CHO cell supernatants employing the described on-line clean-up procedure, consisting of filtration and solid phase extraction with C<sub>4</sub> material. *n*=5, if not stated otherwise. For isoleucine and leucine, the monoisotopic *m/z* signal (=internal standard) was only present in low abundance, therefor in addition to calculated ratios of internal standard (IS) to target mass, also recovery based only on comparison of intensities is shown (indicated as “without IS”)

| Metabolites    | Average [%] | SD [%] |
|----------------|-------------|--------|
| PEP            | 83.6        | 5.8    |
| Pyr            | 83.3        | 5.1    |
| Cit            | 85.8        | 6.8    |
| I-Cit          | 89.1        | 5.9    |
| Aco            | 87.2        | 19.8   |
| AKG (n=4)      | 92.5        | 5.7    |
| Suc            | 84.6        | 3.3    |
| Fum            | 90.5        | 3.6    |
| Mal (n=4)      | 92.6        | 5.4    |
| Ri-FI          | -           | -      |
| NAD            | 65.0        | 10.6   |
| NADP           | 86.7        | 4.3    |
| 3AMP           | 45.0        | 13.7   |
| 5AMP           | 78.2        | 17.8   |
| 5CMP           | 92.2        | 7.4    |
| 5GMP           | 85.5        | 5.6    |
| 5UMP           | 92.2        | 5.6    |
| Ala RPLC       | 125.6       | 37.4   |
| Arg HILIC      | 97.6        | 21.4   |
| Asn RPLC       | 128.2       | 19.5   |
| Asp RPLC       | 90.4        | 6.4    |
| Gln HILIC      | 116.7       | 7.7    |
| Glu HILIC      | 120.7       | 8.0    |
| His HILIC      | 106.3       | 8.3    |
| Lys HILIC      | 103.2       | 12.5   |
| Pro HILIC      | 107.5       | 8.0    |
| Ser HILIC      | 138.7       | 25.2   |
| Thr HILIC      | 114.2       | 11.3   |
| Met RPLC       | 94.3        | 8.3    |
| Val HILIC      | 114.7       | 12.8   |
| Ile RPLC       | 156.4       | 33.3   |
| Ile without IS | 109.5       | 5.5    |
| Leu RPLC       | 94.7        | 32.5   |
| Leu without IS | 61.0        | 3.0    |
| Phe RPLC       | 100.7       | 27.4   |
| Tyr HILIC      | 91.3        | 7.6    |
| Trp RPLC       | 45.5        | 8.8    |
